# Supplementary material for: Chromosome-specific NOR inactivation explains selective rRNA gene silencing and dosage control in Arabidopsis
Source: PubMed Central journal article supplement (PMC4719308; doi:10.1101/gad.273755.115), 2016-01-15
Supplement: supp_gad.273755.115_Figure_S1_PCR_Primers.pdf [file supp_gad.273755.115_Figure_S1_PCR_Primers.pdf]

Figure S1. Primers used in this study

**Primers for CAPs assays to distinguish alleles of parental ecotypes in RIL populations**

| RIL Population | Marker name (see Fig 3) | Primers                                                                          | Restriction enzyme                                            |              |
|----------------|-------------------------|----------------------------------------------------------------------------------|---------------------------------------------------------------|--------------|
| Col x Sha      | c2_00069                | ACCTTGACGACCAGTCTTGG Forward<br>CTCCGGATAAGTTGGAGTCG Reverse                     | <i>MlyI</i>                                                   |              |
|                | c2_00078                | CCTCCTTCTAGTTCTAGAGCAGGTC Forward<br>CCGGTGAATCGAAATTCATGACTCGG Reverse          | <i>MseI</i>                                                   |              |
|                | c4_00012                | CTAAACATGCAGAACGGTAATTACACGGG Forward<br>GGTATCAGTAAGACAGCGGAGAATGCAACCG Reverse | <i>ApoI</i>                                                   |              |
|                | c4_00049                | CTGTGAAGAATGCGCGTAAGAAGG Forward<br>CCAAACATCCAACATTATATAGGGGC Reverse           | <i>DraI</i>                                                   |              |
|                | c4_00086                | GGGACCTCAATAGCTTCTTTGGCTG Forward<br>GCTAACGTGTCTTCCCAATGG Reverse               | <i>HinfI</i>                                                  |              |
|                | c4_00090                | CTTACTTTGACTCCGAGCAAGGAG Forward<br>AACTTTGCCAAAAGGCAAGGCC Reverse               | <i>HinfI</i>                                                  |              |
|                | Col x Bur               | c2_00074                                                                         | TCGTGCAATCGTTCTGAAC Forward<br>CCCTTGCTGATTTTGCAAT Reverse    | <i>HinfI</i> |
|                |                         | c4_00090                                                                         | GCCTTTTGGGCAAAGTTATG Forward<br>TGTTGCCAACAGAGGAAGATT Reverse | <i>DraI</i>  |
|                |                         | c4_00093                                                                         | TTCCCGCTTACATCAAC Forward<br>TTCATTTGGCAATCAAGA Reverse       | <i>MlyI</i>  |
| Col x Ler      |                         | c2_00069                                                                         | ACCTTGACGACCAGTCTTGG Forward<br>CTCCGGATAAGTTGGAGTCG Reverse  | <i>XbaI</i>  |
|                | c2_00078                | CAGCCGTATACCGGAGCTA Forward<br>ACACCCGGTGAATCGAAAT Reverse                       | <i>MseI</i>                                                   |              |
|                | c4_00030                | GGATAGTTTGGTCAACAAGAGAGGAGC Forward<br>GGGAACAAGATTTCACTGGCTTGTTCAC Reverse      | <i>MspI</i>                                                   |              |

**Primers to amplify chromosomal markers to map the Col-0 / Sf-2 breakpoint in the introgression line**

| Primer name | Primer   | Restriction enzyme                     |
|-------------|----------|----------------------------------------|
| 430         | c4_00430 | GCCGCTTAACCAGACTATGTTCTTGATTC Forward  |
| 430         | c4_00430 | GGAAACAGTCTGAATTTAGGGAACACTAAC Reverse |
| 580         | c4_00580 | AAACTTCTTCTTCTCTCTCGCCATC Forward      |
| 580         | c4_00580 | CCCGTGGCGTGTTCATCCATTAC Reverse        |
|             |          | <i>SfaNI</i>                           |
|             |          | <i>XmnI</i>                            |

**Primers used for PCR and RT-PCR assays**

| Primer name                | Primers                                                                  |
|----------------------------|--------------------------------------------------------------------------|
| 3ETS variable region       | GACAGACTTGCCAAAACGCCAC Forward<br>CCTGGTCGAGGAATCCTGGACGATT Reverse      |
| Actin                      | GAGAGATTGAGTCCAGAGGTC Forward<br>TGGATTCCAGCAGCTTCCA Reverse             |
| Subtype 3/4 - specific VAR | GACAGACTTGCCAGAACGCCACC Forward<br>GAAGGAATCTGGACGATTACTGCTAGTTC Reverse |

**Primers for CAPS or dCAPS assays of gene subtype SNPs**

| Polymorphism           | Primers                                                                                      | Restriction enzyme       | RIL population used for mapping to NOR2 or NOR4 |
|------------------------|----------------------------------------------------------------------------------------------|--------------------------|-------------------------------------------------|
| T2943A                 | GAGTCTGGGCAGTCCGTGGGAACCCCAAT Forward<br>GGACGGTCGGTCATTCCTCGTG Reverse                      | <i>MluCI</i>             | Col-0 x Bur-0                                   |
| G2982A                 | GAGTCTGGGCAGTCCGTGG Forward<br>CAAGCAAGCCATTCTCCTC Reverse                                   | <i>EcoRV</i>             | Col-0 x Bur-0                                   |
| T3439C                 | GGCATCTTTTACCTCGTCCGCGAA Forward<br>CCTAGGCGGGTGAATCGATGCCATGGGACATCTCGGATTTCTGGCCCG Reverse | <i>MspI</i>              | Col-0 x Bur-0                                   |
| T4302C, C4456G, A4565T | GGCTGTCCCGAAGTATCTCGCG Forward<br>AAGACGGATGAGCTTTGGCGGG Reverse                             | <i>AluI, NaeI, EcoRV</i> | Col-0 x Bur-0                                   |
| A6645C                 | GATACCTGTCCAAAACAGAACGCCGCG Forward<br>ACTTCAGTTCGACAGCACGATCCG Reverse                      | <i>SphI</i>              | Col-0 x Sha                                     |
| INDEL 6678+CAT         | CGAGGGCACGTCTGCTGGGTGCACAAATCGTCCCTCAGATT Forward<br>AAGTTCACCACCGCATGTCGGTACG Reverse       | <i>HinfI</i>             | Col-0 x Bur-0                                   |
| G7122A                 | CGACTCTCGGCAACGGATA Forward<br>CGAACGCCGAGACGTCCGAT Reverse                                  | <i>MspI</i>              | Col-0 x Bur-0                                   |
| G307T                  | GACAGACTTGCCAAAACGCCAC Forward<br>CCTGGTCGAGGAATCCTGGACGATT Reverse                          | <i>HindIII</i>           | Col-0 x Sha                                     |
