# Supplementary material for: Chromosome-specific NOR inactivation explains selective rRNA gene silencing and dosage control in Arabidopsis
Source: PubMed Central journal article supplement (PMC4719308; doi:10.1101/gad.273755.115), 2016-01-15
Supplement: supp_gad.273755.115_Figure_S11.pdf [file supp_gad.273755.115_Figure_S11.pdf]

**Figure S11: BAC clones and the rRNA gene variant types they contain**

| BAC clone | rRNA gene types | BAC clone | rRNA gene types | BAC clone | rRNA gene types | BAC clone | rRNA gene types |
|-----------|-----------------|-----------|-----------------|-----------|-----------------|-----------|-----------------|
| F1A16     | 2               | F1H16     | 1               | F2A17     | 2               | F2J22     | 1,3             |
| F1A18     | 3               | F1H17     | 3               | F2B1      | 1               | F2J3      | 1,3             |
| F1A19     | 1,3             | F1H23     | 1,3             | F2B14     | 2               | F2J8      | 1               |
| F1A20     | 1,3             | F1I13     | 2               | F2B19     | 2               | F2J9      | 1               |
| F1B14     | 1               | F1I15     | 2               | F2B5      | 2               | F2K5      | 2               |
| F1B23     | 1               | F1I9      | 1,3             | F2C3      | 1               | F2L11     | 1,3             |
| F1C17     | 1,3             | F1J10     | 1               | F2D7      | 2               | F2L18     | 1,3             |
| F1C20     | 1,3             | F1J16     | 1,3             | F2D8      | 2               | F2L21     | 1,3             |
| F1D2      | 3               | F1K10     | 1               | F2D9      | 1               | F2M10     | 1               |
| F1D24     | 1,3             | F1K15     | 1,3             | F2E13     | 1,3             | F2M12     | 1,3             |
| F1D8      | 1               | F1K2      | 2               | F2F3      | 2               | F2M13     | 1               |
| F1E1      | 1               | F1L21     | 1,3             | F2F7      | 3               | F2M18     | 1,3             |
| F1E12     | 1,3             | F1M1      | 1               | F2F8      | 1               | F2N10     | 2               |
| F1E13     | 3               | F1M2      | 2               | F2G13     | 1,3             | F2N24     | 2               |
| F1E20     | 1               | F1M3      | 1,3             | F2G18     | 1,3             | F2N4      | 1               |
| F1F11     | 1               | F1N3      | 1               | F2G3      | 1,3             | F2O12     | 1,3             |
| F1F16     | 1               | F1N7      | 1               | F2H8      | 3,4             | F2O18     | 1,3             |
| F1F17     | 1               | F1O7      | 2               | F2I20     | 1,3             | F2O20     | 1               |
| F1F21     | 2               | F1O8      | 2               | F2I24     | 2               | F2O24     | 2               |
| F1F4      | 1,3             | F1P14     | 2               | F2I6      | 1,3             | F2O4      | 1               |
| F1F5      | 1,3             | F1P17     | 1               | F2I8      | 1,3             | F2P1      | 1,3             |
| F1G11     | 1,3             | F1P24     | 2               | F2J17     | 1               | F3A12     | 1,3             |
| F1G17     | 1               | F2A10     | 2               | F2J21     | 1,3             |           |                 |
